# Supplementary material for: Semantic and syntactic information processing during auditory language comprehension: A spectral stereo-EEG approach
Source: Research Square preprint supplement (doi:10.21203/rs.3.rs-1505907/v1), 2022-04-08
Supplement: Supplementary file 1 [file 718de74873b8c8c04aad4254.docx]

# Supplementary Material


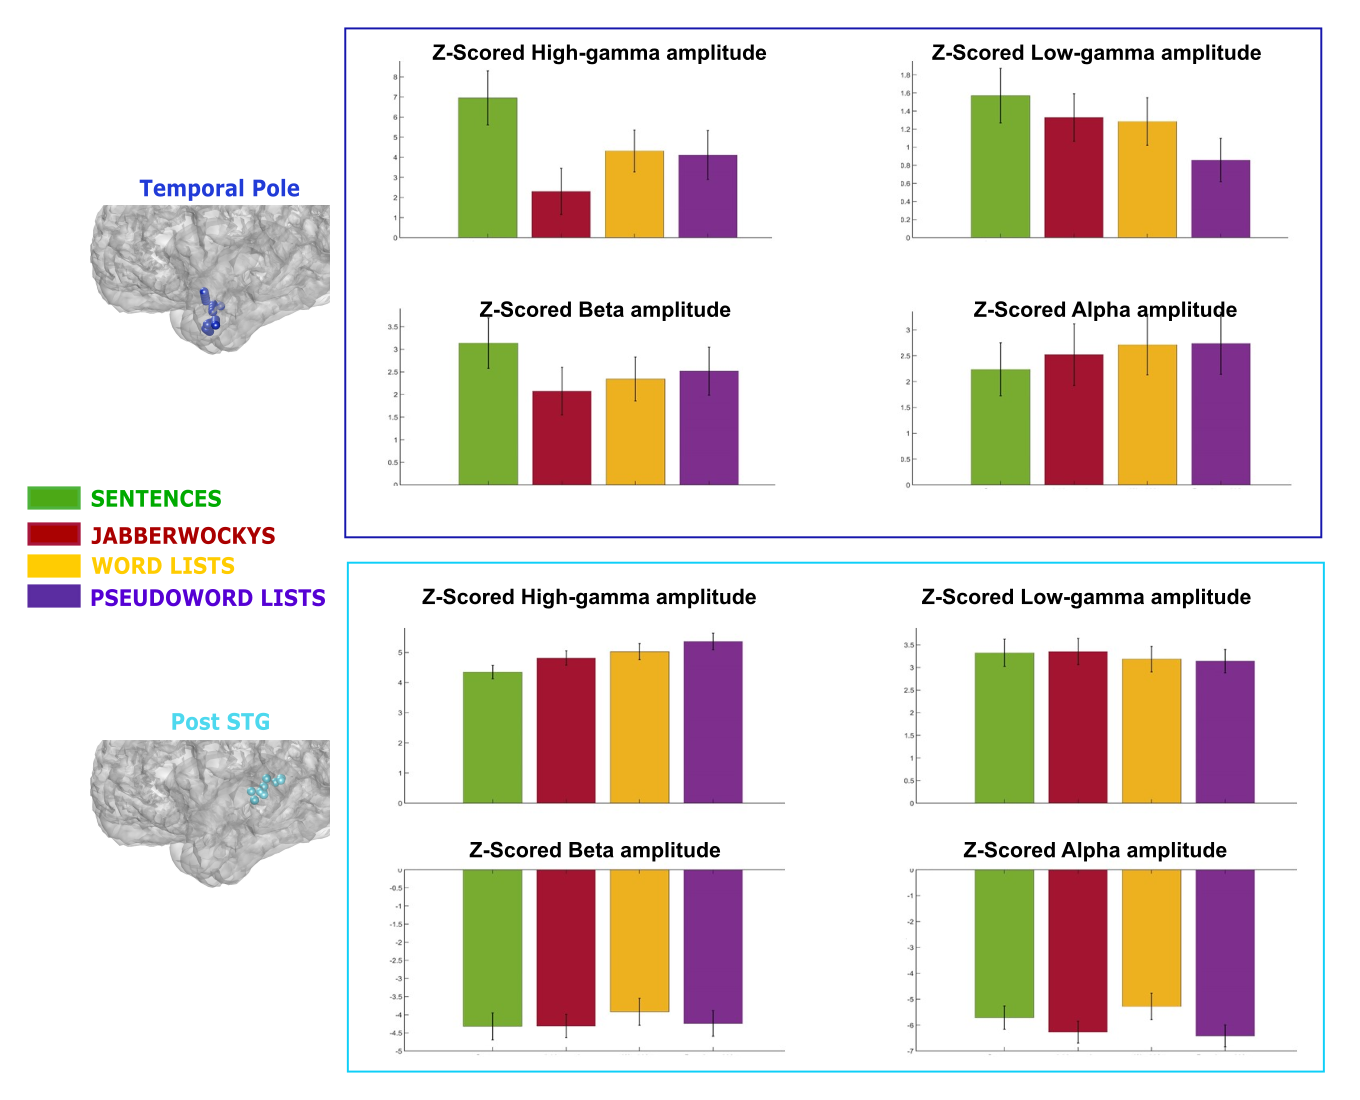


**Figure S1:** Z-Score amplitude responses for each language condition and each frequency band assessed in the Temporal Pole and Post STG
